# Supplementary figures and images for: Cdc14 spatiotemporally dephosphorylates Atg13 to activate autophagy during meiotic divisions
Source: PubMed Central journal article supplement — J Cell Biol. 2022 Mar 3;221(5):e202107151. doi: 10.1083/jcb.202107151 (PMC8919667; doi:10.1083/jcb.202107151), 2022-03-03

F2 D anti-FLAG

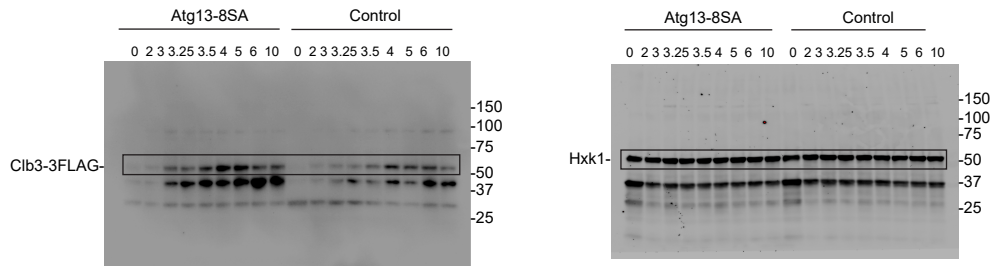

Supplement: JCB_202107151_SourceDataF2.pdf [file JCB_202107151_SourceDataF2.pdf]

5G

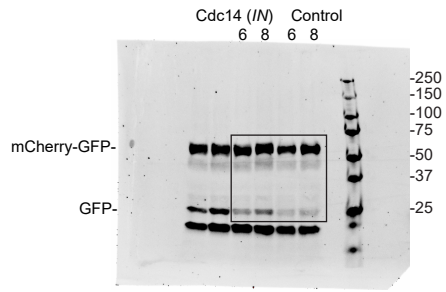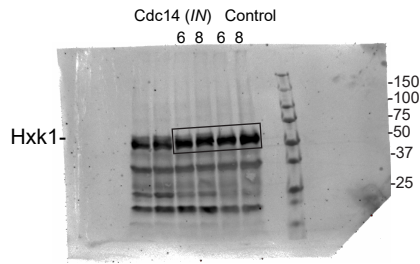

5F

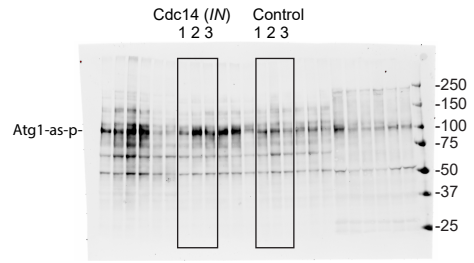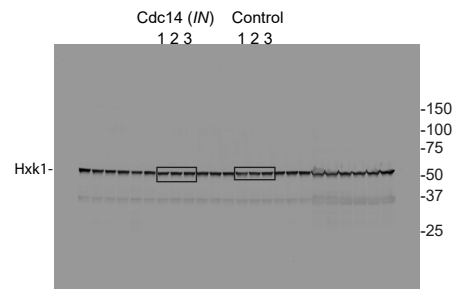

Supplement: JCB_202107151_SourceDataF5.pdf [file JCB_202107151_SourceDataF5.pdf]

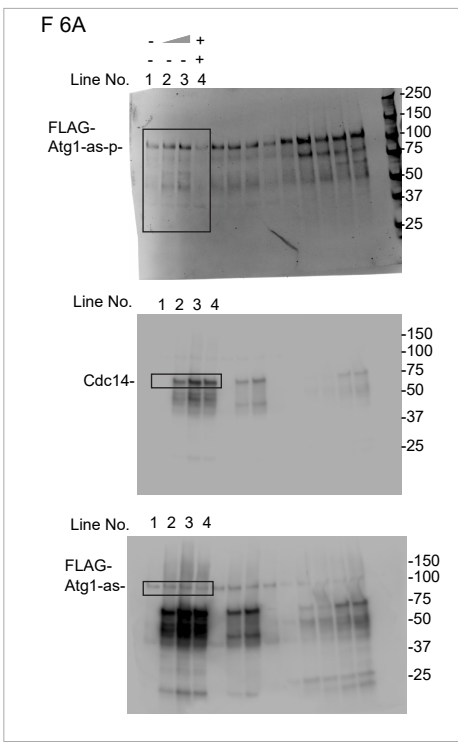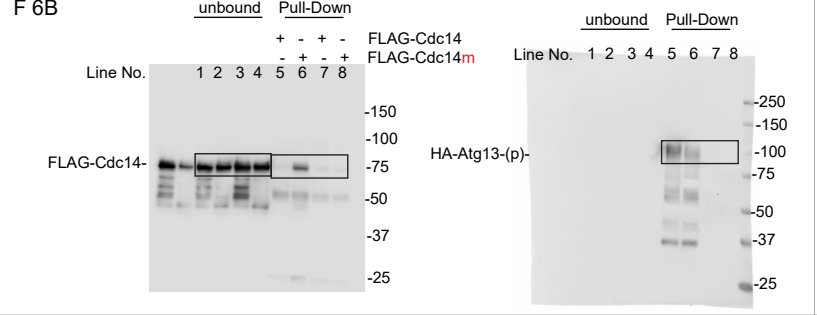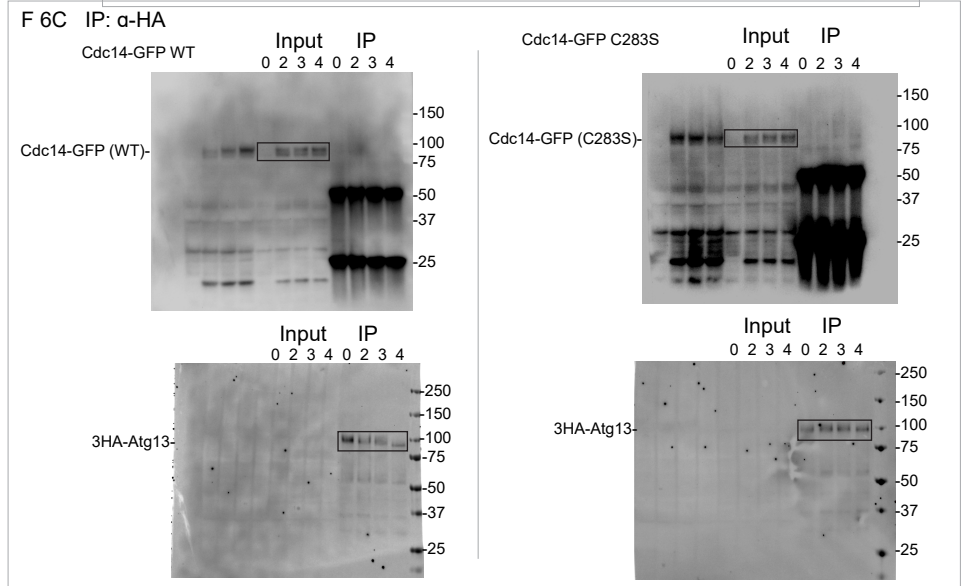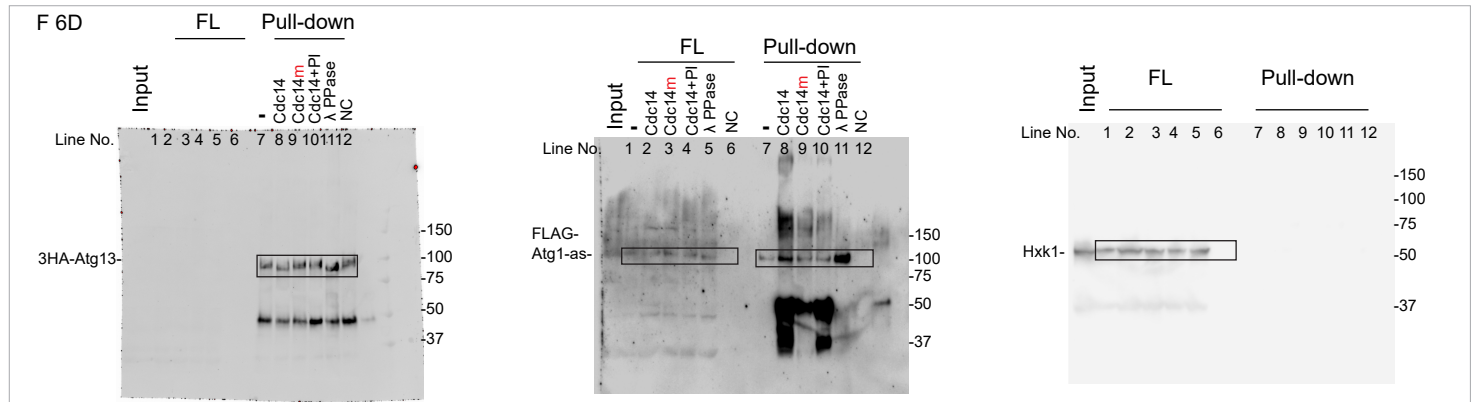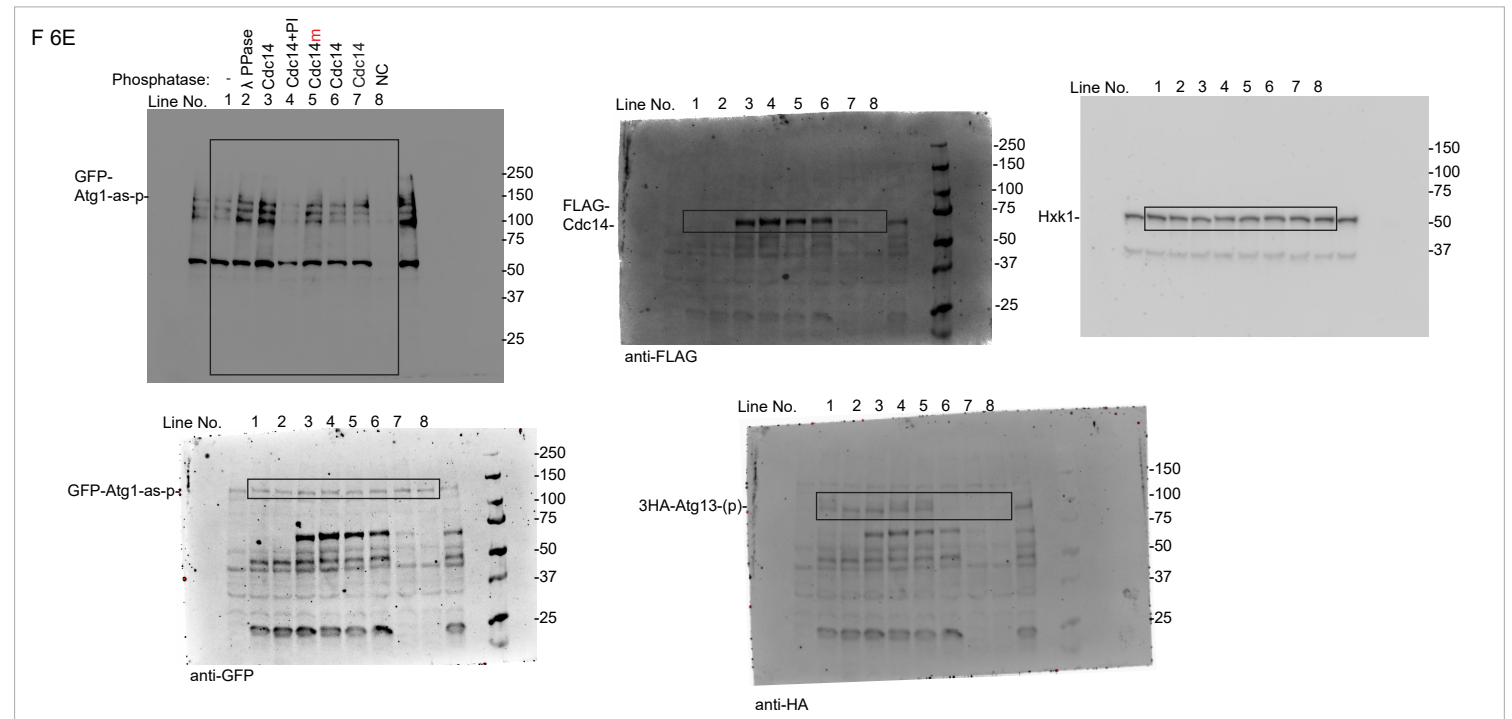

Supplement: JCB_202107151_SourceDataF6.pdf [file JCB_202107151_SourceDataF6.pdf]

F 7A

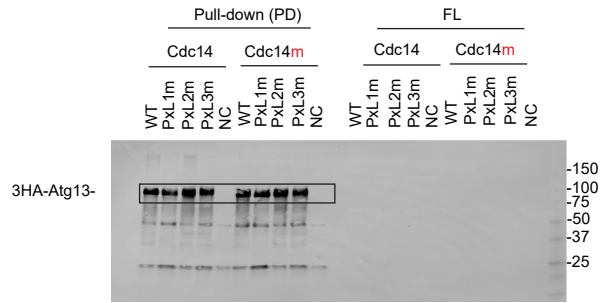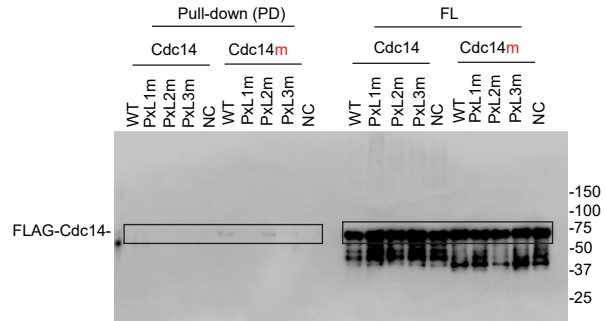

Supplement: JCB_202107151_SourceDataF7.pdf [file JCB_202107151_SourceDataF7.pdf]

F 8A

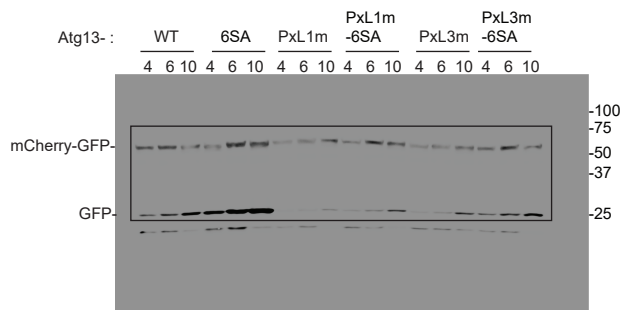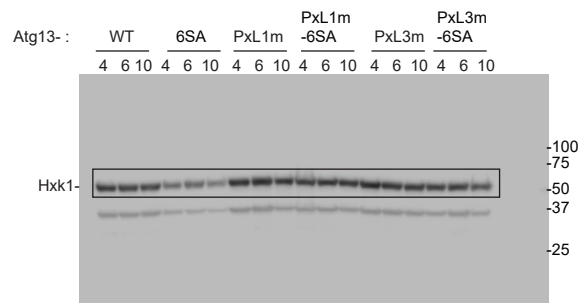

Supplement: JCB_202107151_SourceDataF8.pdf [file JCB_202107151_SourceDataF8.pdf]

F S1A

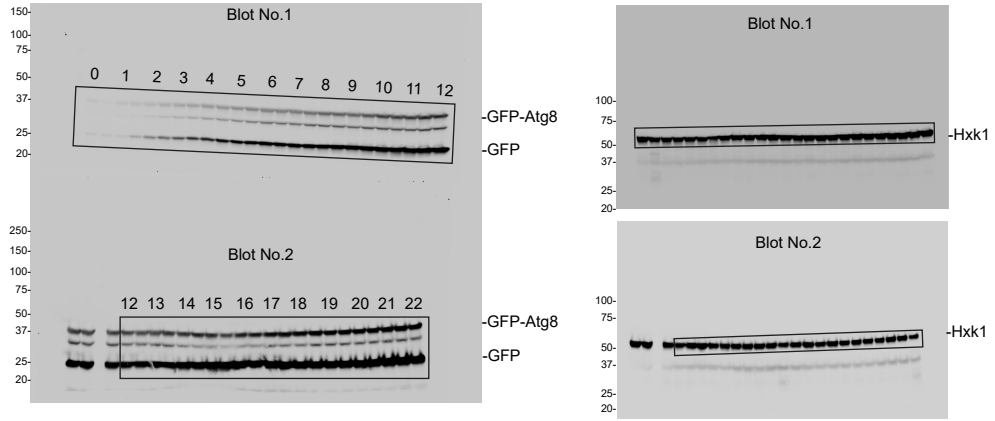

F S1B

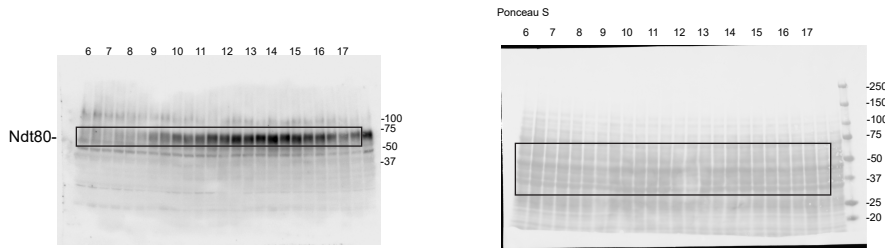

F S1C

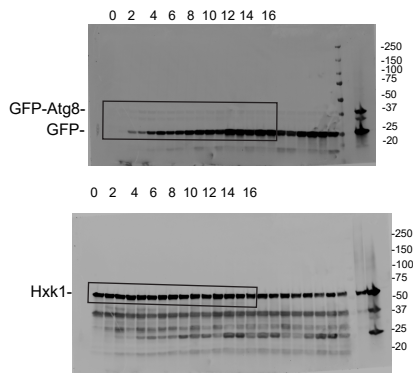

F S1E

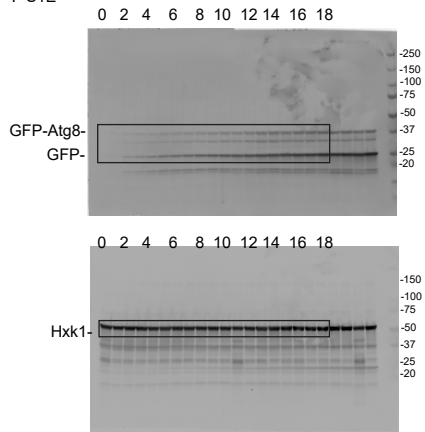

Supplement: JCB_202107151_SourceDataFS1.pdf [file JCB_202107151_SourceDataFS1.pdf]

F S2H

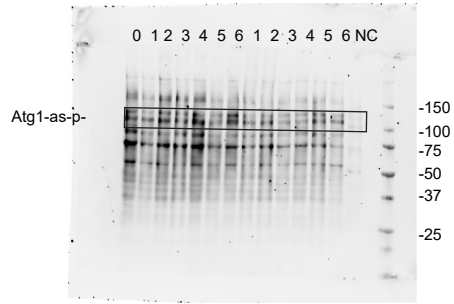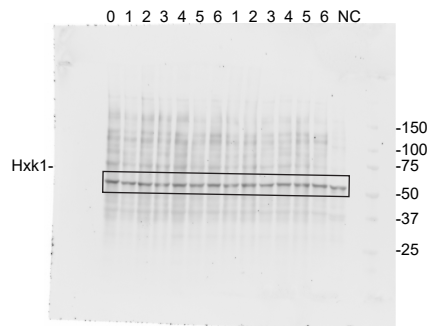

F S2G

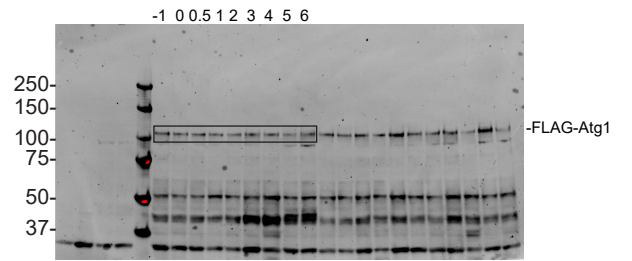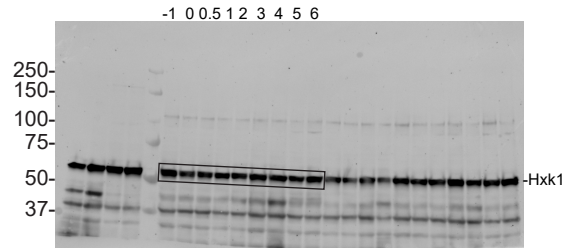

Supplement: JCB_202107151_SourceDataFS2.pdf [file JCB_202107151_SourceDataFS2.pdf]

F S3I

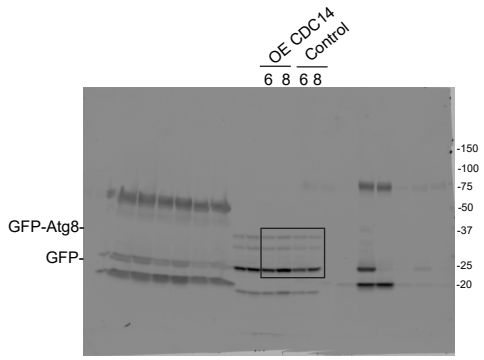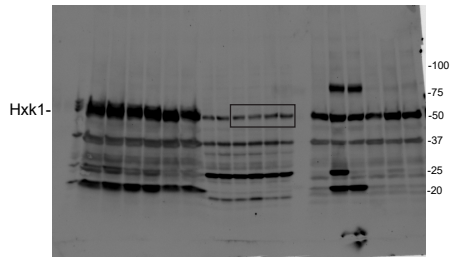

Supplement: JCB_202107151_SourceDataFS3.pdf [file JCB_202107151_SourceDataFS3.pdf]

F S4B

Coomassie Blue staining

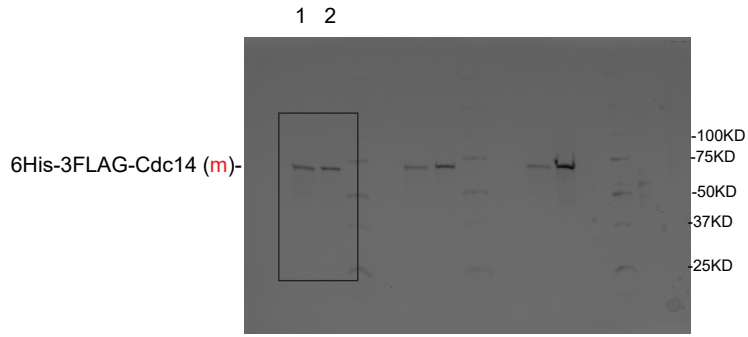

F S4F

SYPRO Ruby staining

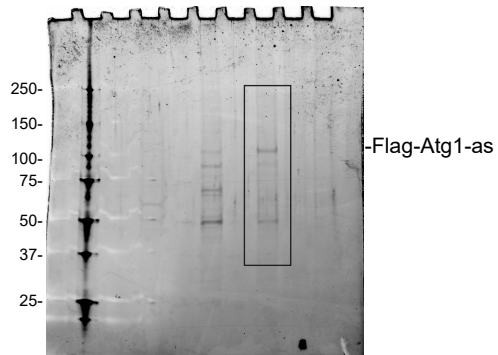

Supplement: JCB_202107151_SourceDataFS4.pdf [file JCB_202107151_SourceDataFS4.pdf]

F S5C

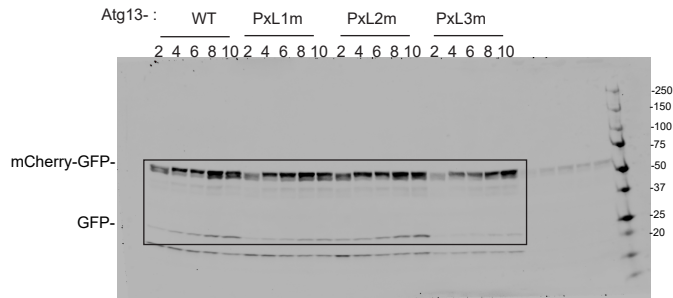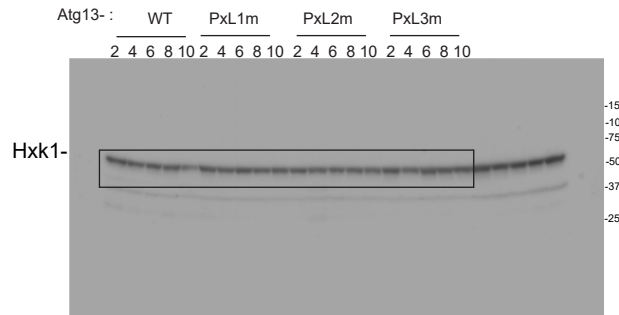

F S5D

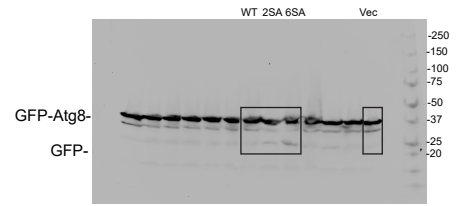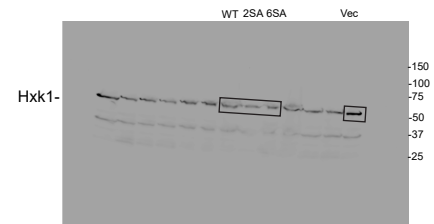

F S5E

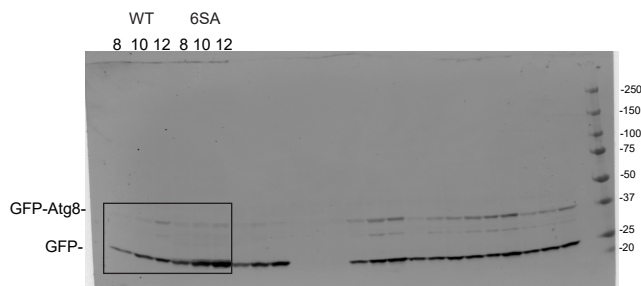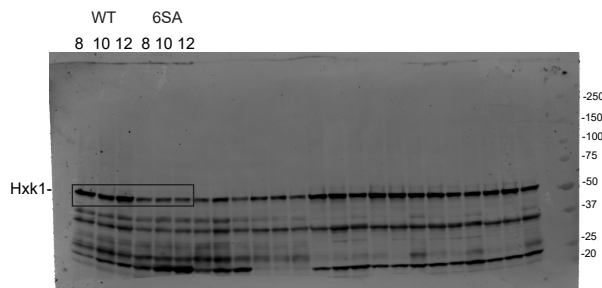

Supplement: JCB_202107151_SourceDataFS5.pdf [file JCB_202107151_SourceDataFS5.pdf]
